# Supplementary material for: A Targeted Literature Review Examining Biologic Therapy Compliance and Persistence in Chronic Inflammatory Diseases to Identify the Associated Unmet Needs, Driving Factors, and Consequences
Source: Springer Nature journal article supplement (doi:10.1007/s12325-018-0759-0), 2018-08-04
Supplement: MOESM1 [file 16001558]

## ELECTRONIC SUPPLEMENTARY MATERIALS

**Supplementary Figure 1.** Prisma flow diagram detailing all articles identified during the first targeted literature review and the associated reasons for exclusion

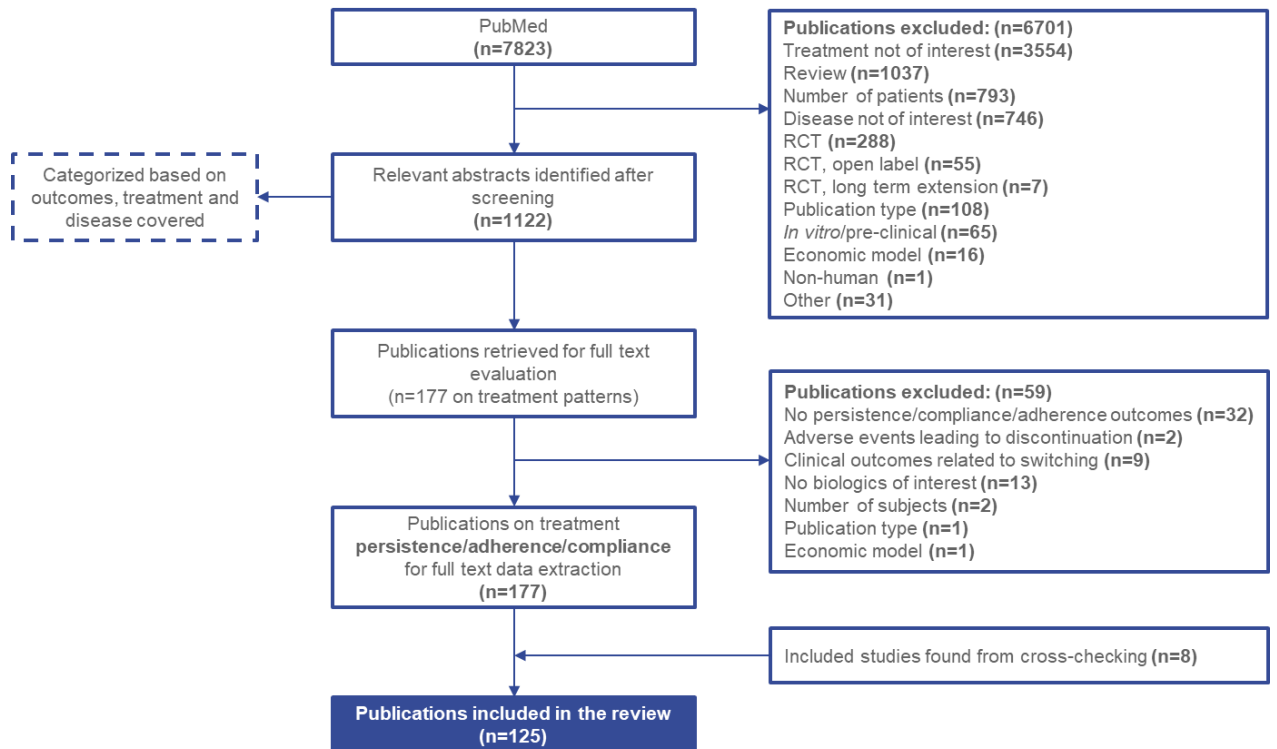

**Supplementary Figure 1.** Prisma flow diagram detailing all articles identified during the second targeted literature review and the associated reasons for exclusion

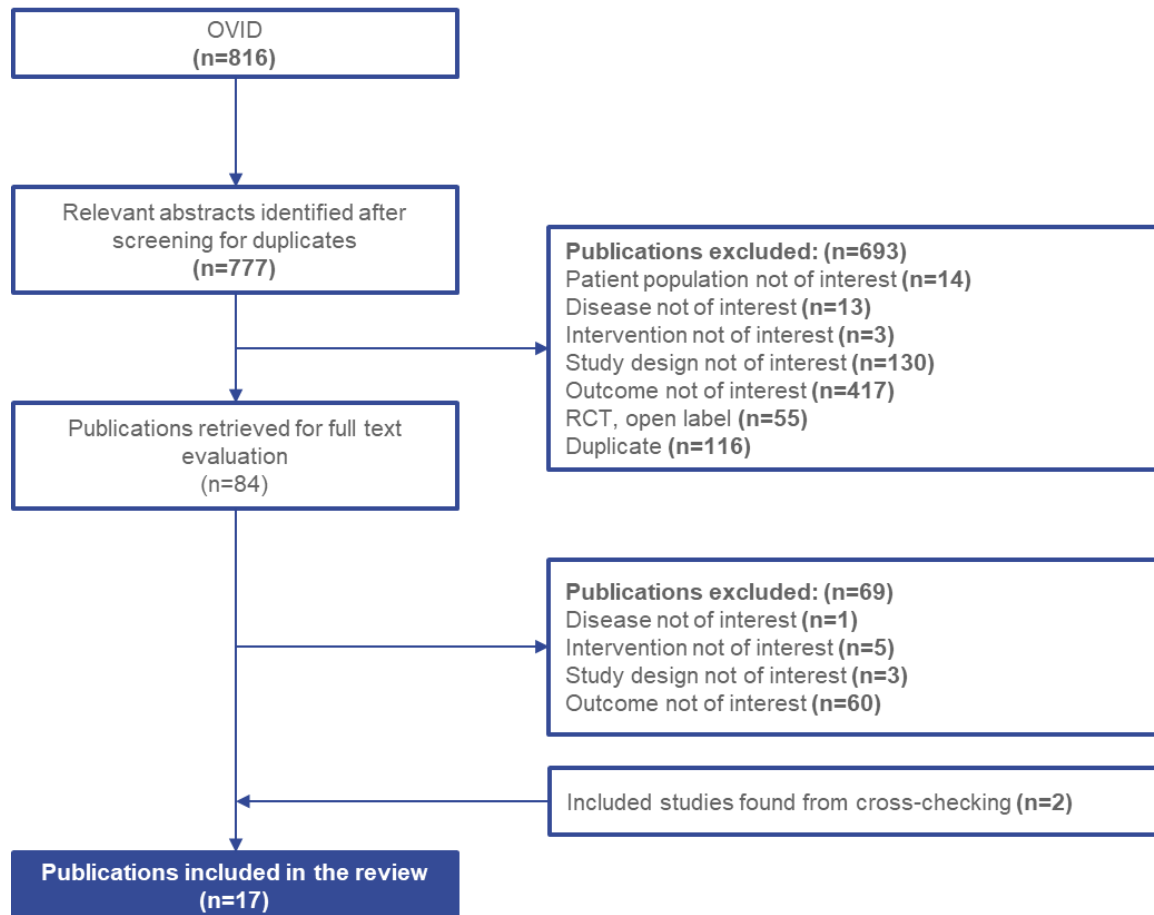

**Online Resource 1.** A summary of all studies identified reporting rates of treatment persistence and compliance, separated by disease indication

| Study                                                                 | Treatment/Patient population                                         | Type of study                                                                  | Compliance | Persistence |
|-----------------------------------------------------------------------|----------------------------------------------------------------------|--------------------------------------------------------------------------------|------------|-------------|
| <b>AS</b>                                                             |                                                                      |                                                                                |            |             |
| <b>Arends et al. Arthritis Res Ther. 2012;14(2):R98.</b>              | ETAN, INF, ADA: Total: 111                                           | Prospective longitudinal observational cohort                                  |            | X           |
| <b>Glintborg et al. Ann Rheum Dis. 2010;69(11):2002–8.</b>            | ADA: 247 (29%); ETAN: 150 (18%); INF: 445 (53%)                      | Retrospective review of clinical records                                       |            | X           |
| <b>Glintborg et al. Ann Rheum Dis. 2013;72(7):1149–55.</b>            | ADA: 532 (37%); ETAN: 231 (16%); INF: 653 (45%); GOL: 20 (1%)        | Retrospective review of clinical records                                       |            | X           |
| <b>Gulyas et al. Eur J Health Econ. 2014;15(Suppl 1):S93–100.</b>     | Non-switchers: 98; Switchers: 77                                     | Retrospective, single-center, observational                                    |            | X           |
| <b>Kristensen et al. Arthritis Care Res. 2010;62(10):1362–9.</b>      | Spondylitis: 122; Peripheral arthritis: 121                          | Prospective, observational study cohort                                        |            | X           |
| <b>Lie et al. Ann Rheum Dis. 2011;70(1):157–63.</b>                   | Non-switchers: 437; Switchers: 77                                    | Longitudinal observational multicenter                                         |            | X           |
| <b>Luc et al. J Rheumatol. 2007;34(10):2078–81.</b>                   | INF: 74; ETAN: 72; ADA: 29                                           | Retrospective, observational study in a single-center tertiary-referral clinic |            | X           |
| <b>Nell-Duxneuner et al. Clin Pharmacol Ther. 2012;50(12):867–72.</b> | ETAN: 123; INF: 154; ADA: 62                                         | Retrospective                                                                  |            | X           |
| <b>Pavelka et al. Clin Exp Rheumatol. 2009;27(6):958–63.</b>          | INF, ADA, ETAN: Total: 310                                           | Registry study                                                                 |            | X           |
| <b>axSpA</b>                                                          |                                                                      |                                                                                |            |             |
| <b>Gulfe et al. Scand J Rheumatol. 2014;43(6):493–7.</b>              | INF: 25; ETAN: 53; ADA: 23; GOL: 8; CZP: 3                           | Prospective                                                                    |            | X           |
| <b>CD</b>                                                             |                                                                      |                                                                                |            |             |
| <b>Billioud et al. Inflamm Bowel Dis. 2011;17(1):152–9.</b>           | ADA: 108                                                             | Observational multicenter                                                      | X          |             |
| <b>Carter et al. Adv Ther. 2011;28(8):671–83.</b>                     | INF: Adherent: 466; Non-adherent: 172                                | Retrospective database                                                         | X          |             |
| <b>De Bie et al. Aliment Pharmacol Ther. 2010;33(2):243–50.</b>       | INF: 152                                                             | Observational Multicenter                                                      |            | X           |
| <b>Gonzaga et al. Inflamm Bowel Dis. 2009;15(12):1837–43.</b>         | Discontinued INF infusions 1 year: 42; Ongoing INF after 1 year: 112 | Retrospective, observational                                                   |            | X           |
| <b>Kane et al. Aliment Pharmacol Ther.</b>                            | INF: 274                                                             | Retrospective database                                                         | X          |             |

|                                                                    |                                                                                          |                                                    |   |   |
|--------------------------------------------------------------------|------------------------------------------------------------------------------------------|----------------------------------------------------|---|---|
| <b>2006;24(7):1099–103.</b>                                        |                                                                                          |                                                    |   |   |
| <b>Kane et al. Adv Ther. 2009;26(10):936–46.</b>                   | INF: Adherent: 375; Non-adherent: 196                                                    | Claims data                                        | X |   |
| <b>Nuti et al. J Pediatr Gastroenterol Nutr. 2014;58(5):582–7.</b> | INF and ADA: 78                                                                          | Retrospective, single-center, cohort               |   | X |
| <b>Stein et al. Inflamm Bowel Dis. 2010;16(7):1173–9.</b>          | INF: 104                                                                                 | Retrospective, observational                       | X |   |
| <b>IBD</b>                                                         |                                                                                          |                                                    |   |   |
| <b>Desai et al. Inflamm Bowel Dis. 2013;19(2):309–15.</b>          | INF: 45; ADA: 9                                                                          | Retrospective review of clinical records           |   | X |
| <b>Freling et al. Am J Gastroenterol. 2015;110(8):1186–96.</b>     | INF and ADA: 583                                                                         | Retrospective single-center                        |   | X |
| <b>Hiroz et al. Scand J Gastroenterol. 2014;49(10):1207–18.</b>    | CD: 956; UC:775; indeterminate colitis: 40                                               | Cohort                                             |   | X |
| <b>Tabibian et al. Dig Dis Sci. 2015;60(5):1366–74.</b>            | CD: 78; UC: 58                                                                           | Cross-sectional                                    | X |   |
| <b>Vahabnezhad et al. Inflamm Bowel Dis. 2014;20(4):606–13.</b>    | INF: 188 (CD: 157; UC: 31)                                                               | Single-center retrospective cohort                 |   | X |
| <b>JIA</b>                                                         |                                                                                          |                                                    |   |   |
| <b>McErlane et al. Rheumatology (Oxford). 2013;52(10):1905–13.</b> | ETAN (49%); INF (28%); ADA (22%); ANA (1%)                                               | Retrospective observational                        |   | X |
| <b>Tynjala et al. Ann Rheum Dis. 2009;68(4):552–7.</b>             | ETAN: 105; INF: 104                                                                      | Prospective, national, longitudinal, observational |   | X |
| <b>PsA</b>                                                         |                                                                                          |                                                    |   |   |
| <b>Chastek et al. Adv Ther. 2012;29(8):691–7.</b>                  | ADA: 144; ETAN: 202                                                                      | Retrospective review of clinical records           |   | X |
| <b>Fagerli et al. Ann Rheum Dis. 2013;72(11):1840–4.</b>           | Non-switchers: 344; Switcher 1 <sup>st</sup> TNFi: 95; Switcher 2 <sup>nd</sup> TNFi: 95 | Longitudinal cohort                                |   | X |
| <b>Fagerli et al. Ann Rheum Dis. 2014;73(1):132–7.</b>             | TNFi monotherapy: 170; TNFi combination: 270                                             | Longitudinal observational                         |   | X |
| <b>Glintborg et al. Rheumatology (Oxford). 2014;53(11):2100–9.</b> | DANBIO registry: 376; ICEBIO registry: 86                                                | Observational cohort                               |   | X |
| <b>Glintborg et al. Arthritis Rheum. 2011;63(2):382–90.</b>        | ADA: 320; ETAN: 184; INF: 260                                                            | Retrospective review of clinical records           |   | X |
| <b>Glintborg et al. Arthritis Rheum. 2013;65(5):1213–23.</b>       | Biologics (ADA, ETAN, INF, GOL, RTX, TCZ, ABA): 1422                                     | Observational cohort                               |   | X |
| <b>Iannone et al. Scand J Rheumatol.</b>                           | ADA-Polyarticular: 67; ADA-Oligoarticular:                                               | Longitudinal cohort                                |   | X |

|                                                                           |                                                                                                                           |                                          |  |   |
|---------------------------------------------------------------------------|---------------------------------------------------------------------------------------------------------------------------|------------------------------------------|--|---|
| <b>2015;44(3):192–9.</b>                                                  | 37; ETAN-Polyarticular: 96; ETAN-Oligoarticular: 54; INF - Polyarticular: 50; INF-Oligoarticular: 24                      |                                          |  |   |
| <b>Kristensen et al. Ann Rheum Dis. 2008;67(3):364–9.</b>                 | TNFi (ETAN, ADA, INF) with MTX: 161; TNFi without MTX: 100                                                                | Prospective observational                |  | X |
| <b>Saad et al. Arthritis Res Ther. 2009;11(2):R52.</b>                    | ETAN: 316; ADA: 88; INF: 162                                                                                              | Observational                            |  | X |
| <b>Saugou et al. Semin Arthritis Rheum. 2011;40(5):398–406.</b>           | INF: 30; ETAN: 25; ADA: 10                                                                                                | Open-label observational cohort          |  | X |
| <b>Zhang et al. Arthritis Res Ther. 2014;16(4):420.</b>                   | Oral non-biologic DMARDs: 1698 (1217 received MTX); Biologic DMARDs: 3263                                                 | Retrospective                            |  | X |
| <b>Zhu et al. Clin Ther. 2013;35(9):1376–85.</b>                          | Biologics: 2143; Biologic + DMARD: 1021                                                                                   | Retrospective claims database            |  | X |
| <b>PsO</b>                                                                |                                                                                                                           |                                          |  |   |
| <b>Carrascosa et al. J Eur Acad Dermatol Venereol. 2014;28(7):907–14.</b> | Biologics: 1162                                                                                                           | Prospective inception cohort             |  | X |
| <b>Chastek et al. J Dermatolog Treat. 2013;24(1):25–33.</b>               | ADA: 330; ETAN: 497                                                                                                       | Retrospective review of clinical records |  | X |
| <b>Di Lernia et al. J Dermatolog Treat. 2012;23(6):404–9.</b>             | 194 (ETAN, INF, ADA)                                                                                                      | Retrospective observational              |  | X |
| <b>Esposito et al. Br J Dermatol. 2013;169(3):666–72.</b>                 | ADA: 114; ETAN: 389; INF: 147                                                                                             | Retrospective analysis                   |  | X |
| <b>Esposito et al. Drug Dev Res. 2014;75(Suppl 1):S31–4.</b>              | Total: 367; ETAN intermittent: 110 (72.4%); ETAN continuous: 42 (27.6%)                                                   | Retrospective analysis                   |  | X |
| <b>Gniadecki et al. Br J Dermatol. 2011;164(5):1091–6.</b>                | ADA: 347; ETAN: 271; INF: 129                                                                                             | Retrospective claims database            |  | X |
| <b>Gniadecki et al. Br J Dermatol. 2015;172(1):244–52.</b>                | ADA: 567; ETAN: 364; INF: 176; UST: 170                                                                                   | Prospective cohort                       |  | X |
| <b>Kim et al. J Am Acad Dermatol. 2015;73(2):237–41.</b>                  | UST: 176; ETAN: 175; ADA: 134; INF: 60                                                                                    | Multicenter retrospective chart review   |  | X |
| <b>Lopes et al. Rev Saude Publica. 2014;48(4):651–61 (discussion 61).</b> | ADA: 14; EFA: 43; ETAN: 35; INF: 111                                                                                      | Descriptive cross-sectional              |  | X |
| <b>Luber et al. J Am Acad Dermatol. 2014;70(3):525–32.</b>                | INF: 93                                                                                                                   | Retrospective cohort                     |  | X |
| <b>Piaserico, S et al. J Am Acad Dermatol. 2014;70(2):257–62.e3.</b>      | 5423 identified; 4389 with data; 228 switch to 2 <sup>nd</sup> TNFi; complete follow-up data for 105 (n=105 for outcomes) | Prospective, observational, cohort       |  | X |
| <b>Svedbom et al. J Eur Acad Dermatol</b>                                 | Biologics: 506                                                                                                            | Database analysis                        |  | X |

|                                                                 |                                                                                                             |                                                      |   |   |
|-----------------------------------------------------------------|-------------------------------------------------------------------------------------------------------------|------------------------------------------------------|---|---|
| <b>Venereol. 2015;29(2):215–23.</b>                             |                                                                                                             |                                                      |   |   |
| <b>van den Reek et al. Br J Dermatol. 2014;171(5):1189–96.</b>  | ADA: 101; ETAN: 82; UST: 66                                                                                 | Prospective registry                                 |   | X |
| <b>RA</b>                                                       |                                                                                                             |                                                      |   |   |
| <b>Agarwal et al. J Rheumatol. 2008;35(9):1737–44.</b>          | Not using a TNFi: 419; Using a TNFi: 503 (ETAN: 304; INF: 71; ADA: 128)                                     | Prospective, observational, single-center cohort     |   | X |
| <b>Blom et al. J Rheumatol. 2009;36(10):2171–7.</b>             | Non-responders: 49; Loss of response: 75; AEs: 75                                                           | Observational registry                               |   | X |
| <b>Bluett et al. Rheumatology (Oxford). 2015;54(3):494–9.</b>   | TNFi (ETAN, ADA, CZP, GOL): 392                                                                             | Observational cohort                                 | X |   |
| <b>Borah et al. Curr Med Res Opin. 2009;25(6):1365–77.</b>      | ETAN: 2537; ADA: 1293                                                                                       | Retrospective cohort analysis                        | X | X |
| <b>Cho et al. Rheumatol Int. 2012;32(12):3851–6.</b>            | ADA: 219; ETAN: 143; INF: 26                                                                                | Retrospective database                               |   | X |
| <b>Curkendall et al. Arthritis Rheum. 2008;59(10):1519–26.</b>  | ETAN/ADA: 2285                                                                                              | Retrospective cohort                                 | X | X |
| <b>De Keyser et al. J Rheumatol. 2014;41(9):1761–5.</b>         | RTX: 649                                                                                                    | Database analysis                                    |   | X |
| <b>De Keyser et al. J Rheumatol. 2014;41(7):1276–81.</b>        | INF: 507                                                                                                    | -                                                    |   | X |
| <b>den Broeder et al. Ann Rheum Dis. 2006;65(6):760–2.</b>      | ANA: 150                                                                                                    | Prospective, in part retrospective, cohort           |   | X |
| <b>Du Pan et al. Arthritis Rheum. 2009;61(5):560–8.</b>         | ETAN: 887; ADA: 882; INF: 597                                                                               | Longitudinal, observational, population-based cohort |   | X |
| <b>Favalli et al. Rheumatology (Oxford). 2014;53(9):1664–8.</b> | 201 discontinued their 1st TNFi; 119 (59.2%) switched to a 2nd TNFi                                         | Retrospective observational                          |   | X |
| <b>Fisher et al. Curr Med Res Opin. 2013;29(5):561–8.</b>       | ETAN New: 1595; ETAN Continuing: 1203; ADA New: 417; ADA Continuing: 507; INF New: 414; INF Continuing: 849 | Retrospective cohort                                 |   | X |
| <b>Fisher et al. BMJ Open. 2014;4(9):e005532.</b>               | INF: 571 (21%); ADA: 453 (16%) ;ETAN: 1718 (63%)                                                            | Population based cohort                              |   | X |
| <b>Flouri et al. Semin Arthritis Rheum. 2014;43(4):447–57.</b>  | INF: 560; ADA: 435; ETAN: 302                                                                               | Prospective cohort                                   |   | X |
| <b>Genevay et al. Arthritis Rheum. 2007;57(4):679–85.</b>       | Elderly RA >65years old: 344; Young RA <65 years old: 1228                                                  | Longitudinal population- based cohort                |   | X |
| <b>Gibofsky et al. Clin Exp Rheumatol. 2015;33(3):297–301.</b>  | ETAN monotherapy: 982 ETAN + MTX: 1356; ETAN + MTX + other DMARDs: 537; ETAN +                              | Prospective, multicenter, observational registry     |   | X |

|                                                                |                                                                                                                                                                                                                                                                          |                            |   |   |
|----------------------------------------------------------------|--------------------------------------------------------------------------------------------------------------------------------------------------------------------------------------------------------------------------------------------------------------------------|----------------------------|---|---|
|                                                                | other DMARDs: 609                                                                                                                                                                                                                                                        |                            |   |   |
| <b>Gomez-Reino et al. Ann Rheum Dis. 2012;71(3):382–5.</b>     | 2000–2003: 1170; 2004–2006: 955; 2007–2009: 782                                                                                                                                                                                                                          | Prospective registry       |   | X |
| <b>Greenberg et al. Ann Rheum Dis. 2012;71(7):1134–42.</b>     | ADA (biologic-naïve): 460; ETAN (biologic-naïve): 480; INF (biologic-naïve): 535; ADA (First-time switcher): 311; ETAN; (First-time switcher): 139; INF (First-time switcher): 166                                                                                       | Prospective cohort         |   | X |
| <b>Gulfe et al. J Rheumatol. 2009;36(3):517–21.</b>            | TNFi (ADA, ETAN, INF): 1789                                                                                                                                                                                                                                              | Database study             |   | X |
| <b>Harley et al. Am J Manag Care. 2003;9(6 Suppl):S136–43.</b> | INF: 141; ETAN: 853; MTX: 1668                                                                                                                                                                                                                                           | Retrospective analysis     | X |   |
| <b>Hetland et al. Ann Rheum Dis. 2008;67(7):1023–6.</b>        | 2000/2001: 273; 2002: 187; 2003: 331; 2004: 534; 2005: 488                                                                                                                                                                                                               | Prospective observational  |   | X |
| <b>Hirabara et al. Clin Rheumatol. 2014;33(9):1247–54.</b>     | ABA: 25; TCZ: 38; ETAN: 26                                                                                                                                                                                                                                               | Retrospective multicenter  |   | X |
| <b>Hishitani et al. Scand J Rheumatol. 2013;42(4):253–9.</b>   | TCZ: 97; INF: 103; ETAN: 143; ADA: 58                                                                                                                                                                                                                                    | Observational cohort       |   | X |
| <b>Hjardem et al. Ann Rheum Dis. 2007;66(9):1184–9.</b>        | Switchers: 235; INF: 178; ETAN: 18; ADA: 39                                                                                                                                                                                                                              | Observational              |   | X |
| <b>Hyrich et al. Arthritis Rheum. 2007;56(1):13–20.</b>        | ADA: 876; ETAN: 2826; INF:3037<br>Stopped 1 <sup>st</sup> agent for inefficacy (switch): 338; Stopped 1 <sup>st</sup> agent for inefficacy (no switch): 503; Stopped 1 <sup>st</sup> agent for AEs (switch): 670; Stopped 1 <sup>st</sup> agent for AEs (no switch): 357 | Prospective cohort         |   | X |
| <b>Iannone et al. J Rheumatol. 2012;39(6):1179–84.</b>         | ADA: 324; ETAN: 311; INF: 218                                                                                                                                                                                                                                            | Prospective cohort         |   | X |
| <b>Iannone et al. Clin Exp Rheumatol. 2015;33(4):524–30.</b>   | INF: 565                                                                                                                                                                                                                                                                 | Prospective cohort         |   | X |
| <b>Kaufmann et al. Clin Rheumatol. 2013;32(9):1347–55.</b>     | 254 (TCZ: 126; TNFi monotherapy: 128)                                                                                                                                                                                                                                    | Retrospective cohort-based |   | X |
| <b>Koike et al. Rheumatol Int. 2012;32(6):1617–24.</b>         | ETAN (with prior INF): 908; ETAN (without prior INF): 6191                                                                                                                                                                                                               | Prospective registry       |   | X |

|                                                                     |                                                                                                                                                              |                                                          |   |   |
|---------------------------------------------------------------------|--------------------------------------------------------------------------------------------------------------------------------------------------------------|----------------------------------------------------------|---|---|
| <b>Kristensen et al. Arthritis Res Ther. 2006;8(6):R174.</b>        | INF (MTX A): 501; INF (other DMARD): 116; INF (B Monotherapy C): 104; ETAN (MTX A): 179; ETAN (other DMARD): 68; ETAN (B Monotherapy C): 198                 | Observational                                            |   | X |
| <b>Lee et al. Rheumatol Int. 2014;34(10):1449–53.</b>               | TNFi (ETAN, INF, ADA): 567                                                                                                                                   | Population-based observational cohort                    |   | X |
| <b>Leffers et al. Ann Rheum Dis. 2011;70(7):1216–22.</b>            | ABA: 150; TCZ: 178                                                                                                                                           | Retrospective review of clinical records                 |   | X |
| <b>Li et al. Value Health. 2010;13(6):805–12.</b>                   | ETAN: 1359 (Patients without cancer diagnoses: 1253); ANA: 267 (without cancer diagnoses: 241); INF: 1012 (without cancer diagnoses: 887)                    | Retrospective study                                      | X |   |
| <b>Marchesoni et al. Ann N Y Acad Sci. 2009;1173:837–46.</b>        | INF: 519; ADA: 303; ETAN: 244                                                                                                                                | Observational                                            |   | X |
| <b>Markatseli et al. Clin Exp Rheumatol. 2012;30(1):31–8.</b>       | INF: 82; ADA: 49; ETAN: 20                                                                                                                                   | Prospective cohort                                       |   | X |
| <b>Markenson et al. J Rheumatol. 2011;38(7):1273–81.</b>            | ETAN: 694; INF: 1427; ADA: 297                                                                                                                               | Retrospective analysis                                   |   | X |
| <b>Matsubara et al. J Rheumatol. 2014;41(8):1583–9.</b>             | ETAN: 588                                                                                                                                                    | Database analysis                                        |   | X |
| <b>Meissner et al. J Med Econ. 2014;17(4):259–65.</b>               | 1 <sup>st</sup> line switchers: 765; 1 <sup>st</sup> line non-switchers: 8992; 2 <sup>nd</sup> line switchers: 300; 2 <sup>nd</sup> line non-switchers: 1874 | Retrospective longitudinal analysis                      |   | X |
| <b>Navarro-Sarabia et al. BMC Musculoskelet Disord. 2009;10:91.</b> | 1st TNFi: 417; 2 <sup>nd</sup> TNFi: 83; 3 <sup>rd</sup> TNFi: 18                                                                                            | Observational, prospective cohort                        |   | X |
| <b>Oei et al. Clin Exp Rheumatol. 2009;27(6):926–34.</b>            | No switch: 112; Switch/stopped: 101                                                                                                                          | Retrospective analysis                                   |   | X |
| <b>Oladapo et al. J Manag Care Spec Pharm. 2014;20(7):657–67.</b>   | ETAN: 578; ADA: 401; INF: 563                                                                                                                                | Retrospective database analysis                          | X |   |
| <b>Ostergaard et al. Scand J Rheumatol. 2007;36(2):151–4.</b>       | INF: 278; ETAN: 22                                                                                                                                           | Database                                                 |   | X |
| <b>Punzi et al. Reumatismo. 2011;63(1):18–28.</b>                   | INF: 248; ETAN: 259; ADA: 196                                                                                                                                | Observational multicenter retrospective cohort           |   | X |
| <b>Santoleri et al. J Med Econ. 2014;17(5):320–5.</b>               | ETAN: 43; ADA: 44                                                                                                                                            | Observational retrospective study                        | X | X |
| <b>Schulze-Koops et al. Clin Exp Rheumatol. 2015;33(2):201–8.</b>   | GOL: Self-injection: 2222; No self-injection: 1058                                                                                                           | Open-label, multinational, multicenter prospective trial | X |   |



|                                                                      |                                                                                                                                                                                                                   |                                              |   |   |
|----------------------------------------------------------------------|-------------------------------------------------------------------------------------------------------------------------------------------------------------------------------------------------------------------|----------------------------------------------|---|---|
| <b>Staples et al. Rheumatology (Oxford). 2011;50(1):166–75.</b>      | ETAN: 1018; ADA: 643; INF: 140                                                                                                                                                                                    | Prospective cohort                           |   | X |
| <b>Stockl et al. J Manag Care Phar. 2010;16(8):593–604.</b>          | DTM ITT: 340; DTM completer: 244; Specialty pharmacy: 244; Community pharmacy: 244<br>Treatment: ETAN, ADA, ANA, ABA, INF, RTX                                                                                    | Observational cohort                         | X |   |
| <b>Takahashi et al. Clin Rheumatol. 2014;33(1):39–47.</b>            | ADA: 120; TCZ: 97; ABA MDA: 86; ABA HDA: 128                                                                                                                                                                      | Observational                                |   | X |
| <b>Tanaka et al. Rheumatol. 2008;18(2):146–52.</b>                   | INF: 410                                                                                                                                                                                                          | Retrospective clinical                       |   | X |
| <b>Tang et al. Clin Ther. 2008;30(7):1375–84.</b>                    | ADA: 145; ETAN: 607; INF 492                                                                                                                                                                                      | Retrospective cohort                         |   | X |
| <b>Tkacz et al. Clin Ther. 2014;36(5):737–47.</b>                    | ADA: 1532; ETAN: 2099; GOL: 261                                                                                                                                                                                   | Exploratory                                  | X |   |
| <b>Vander Cruyssen et al. Arthritis Res Ther. 2010;12(3):R77.</b>    | INF: 511                                                                                                                                                                                                          | Prospective cohort                           |   | X |
| <b>Voulgari et al. Am J Med. 2005;118(5):515–20.</b>                 | INF: 84                                                                                                                                                                                                           | Observational                                |   | X |
| <b>Wendler et al. Arthritis Res Ther. 2014;16(2):R80.</b>            | RTX: 2484                                                                                                                                                                                                         | Multicenter, prospective, non-interventional |   | X |
| <b>Yang et al. Clin Rheumatol. 2012;31(11):1549–57.</b>              | ETAN: 181; ADA: 36                                                                                                                                                                                                | Retrospective cohort study                   |   | X |
| <b>Yazici et al. J Rheumatol. 2009;36(5):907–13.</b>                 | ETAN: 4643; ADA: 1365; INF: 3068                                                                                                                                                                                  | Retrospective analysis                       |   | X |
| <b>Zhang et al. Arthritis Care Res (Hoboken). 2015;67(5):624–32.</b> | Biologic agent combination (with MTX): ABA: 4143; ADA: 2919; ETAN: 2704; INF: 5571; TCZ: 662<br>Biologic monotherapy (no MTX or other non-biologic DMARDs): ABA: 3575; ADA: 1934; ETAN: 2039; INF: 2238; TCZ: 725 | Retrospective cohort study                   | X | X |
| <b>Zink et al. Ann Rheum Dis. 2005;64(9):1274–9.</b>                 | Leflunomide only: 120; Leflunomide + MTX: 141; ETAN: 511; INF: 343; ANA: 70                                                                                                                                       | Retrospective, observational study           |   | X |
| <b>Multiple Disease Indications</b>                                  |                                                                                                                                                                                                                   |                                              |   |   |
| <b>Bonafede et al. Adv Ther. 2012;29(8):664–74.</b>                  | ETAN: 4224; ADA: 2941; INF: 1289                                                                                                                                                                                  | Retrospective cohort study                   |   | X |
| <b>Bonafede et al. J Dermatolog Treat. 2013;24(5):369–73.</b>        | ETAN (PsO): 1609; ETAN (PsA): 679; ETAN (PsO/PsA): 246; ADA (PsO): 1166; ADA (PsA): 518; ADA (PsO/PsA): 235                                                                                                       | Retrospective database analysis              |   | X |
| <b>Borrás-Blasco et al. Expert Opin Biol Ther.</b>                   | ADA: RA: 29; PsA: 17; AS: 9                                                                                                                                                                                       | A two-phase cross-sectional                  | X |   |

|                                                                       |                                                                                                                                                                                                           |                                           |   |   |
|-----------------------------------------------------------------------|-----------------------------------------------------------------------------------------------------------------------------------------------------------------------------------------------------------|-------------------------------------------|---|---|
| <b>2010;10(3):301–7.</b>                                              |                                                                                                                                                                                                           | study                                     |   |   |
| <b>Borrás-Blasco et al. Expert Opin Biol Ther. 2013;13(8):1103–7.</b> | ETAN: RA: 58; PsA: 31; AS: 15                                                                                                                                                                             | A two-phase cross-sectional study         | X |   |
| <b>Brocq et al. Joint Bone Spine. 2007;74(2):148–54.</b>              | RA: 304 (ETAN=157; INF=104; ADA=43); AS 92 (ETAN=65.2; INF=53; ADA=0); SpA: 46 (ETAN=32;INF=9; ADA=5)                                                                                                     | Retrospective study                       |   | X |
| <b>Carmona et al. Arthritis Res Ther. 2006;8(3):R72.</b>              | RA: 4006 (68.46%); SpA total: 1524(26.0%) (Subgroup SpA: AS: 657; PsA: 570; Undifferentiated SpA: 187; CD: 68; Juvenile spondylitis: 19; Reactive arthritis: 12; Chronic seronegative Oligoarthritis: 13) | Registry analysis                         |   | X |
| <b>Dalen et al. Rheumatol Int. 2016;36(7):987–95.</b>                 | ADA: 1823; ETAN: 1704; CZP: 622; GOL: 754                                                                                                                                                                 | Retrospective register study              |   | X |
| <b>Duclos et al. J Rheumatol. 2006;33(12):2433–8.</b>                 | RA: 440; SpA: 290; Others: 40<br>INF: 244 (31.7%); ETAN: 419 (54.4%); ADA: 107 (13.9%)                                                                                                                    | Retrospective                             |   | X |
| <b>Ducourau et al. Arthritis Res Ther. 2011;13(3):R105.</b>           | RA-ATI positive: 7; RA-ATI negative: 10;<br>SpA-ATI positive: 14; SpA-ATI negative: 77                                                                                                                    | Retrospective                             |   | X |
| <b>Fabroni et al. Mediators Inflamm. 2014;2014:862969.</b>            | ADA: 64; ETAN: 135; INF: 69                                                                                                                                                                               | Retrospective cohort                      |   | X |
| <b>Gomez-Reino et al. Arthritis Res Ther. 2006;8(1):R29.</b>          | TNFi: 4706                                                                                                                                                                                                | Registry                                  |   | X |
| <b>Ip et al. N Z Med J. 2015;128(1415):34–40.</b>                     | ADA: 139; ETAN: 25; INF: 19                                                                                                                                                                               | Retrospective review of clinical records  |   | X |
| <b>Kadar et al. Clin Rheumatol. 2014;33(3):329–33.</b>                | RA: 126; AS: 38; PsA: 11                                                                                                                                                                                  | Retrospective, multi-center observational |   | X |
| <b>Lie et al. Ann Rheum Dis. 2015;74(6):970–8.</b>                    | AS, cDMARD comedication: 557; AS, no cDMARD comedication: 808; Undifferentiated SpA, cDMARD comedication: 581; Undifferentiated SpA, no cDMARD comedication: 574                                          | Prospective registry                      |   | X |
| <b>Scire et al. Clin Exp Rheumatol. 2013;31(6):857–63.</b>            | RA: 2640; SpA: 1220 (722 PsA, 498 AS)                                                                                                                                                                     | Observational                             |   | X |
| <b>Titton et al. Rev Bras Reumatol. 2011;51(2):152–60.</b>            | RA: 569; AS: 131; Others: 180                                                                                                                                                                             | Prospective registry                      |   | X |
| <b>Ventura-Ríos et al. Reumatol Clin.</b>                             | ETAN: 679; INF: 525; ADA: 386; RTX: 281                                                                                                                                                                   | Multicenter ambispective registry         |   | X |

|                          |  |  |  |  |
|--------------------------|--|--|--|--|
| <b>2012;8(4):189–94.</b> |  |  |  |  |
|--------------------------|--|--|--|--|

ABA, abatacept; ADA, adalimumab; AE, adverse event; ANA, anakinra; AS, ankylosing spondylitis; axSpA axial spondyloarthritis; bDMARD: biologic disease-modifying antirheumatic drug; CD, Crohn's disease; cDMARD, conventional disease-modifying antirheumatic drug; CZP, certolizumab pegol; DMARD, disease-modifying antirheumatic drug; DTM, disease therapy management; EFA, efalizumab; ETAN, etanercept; GOL, golimumab; HDA: high disease activity; IBD, inflammatory bowel disease; INF, infliximab; ITT, intention to treat; JIA, juvenile idiopathic arthritis; MDA, moderate disease activity; MTX, methotrexate; PsA, psoriatic arthritis; PsO, psoriasis; RA, rheumatoid arthritis; RTX, rituximab; SpA, spondyloarthritis; TCZ, tocilizumab; TNFi, tumor necrosis factor inhibitor; UC, ulcerative colitis; UST, ustekinumab
